# Supplementary material for: A novel antibody-based biosensor method for the rapid measurement of PAH contamination in oysters
Source: PubMed Central journal article supplement — Environ Technol Innov. Author manuscript; Available in PMC 2022 Nov 1. (PMC9531917; doi:10.1016/j.eti.2022.102567), 2022-04-21
Supplement: NIHMS1802151-supplement-Prossner_et_al_Sup_Mat.pdf [file NIHMS1802151-supplement-Prossner_et_al_Sup_Mat.pdf]

1  
2  
3  
4  
5  
6  
7  
8  
9  
10  
11  
12  
13  
14  
15  
16  
17  
18  
19  
20  
21  
22  
23  
24  
25  
26  
27  
28  
29  
30  
31  
32  
33  
34  
35  
36  
37  
38  
39  
40  
41  
42  
43  
44  
45  
46  
47  
48  
49  
50  
51  
52  
53  
54  
55  
56  
57  
58  
59  
60  
61  
62  
63  
64  
65

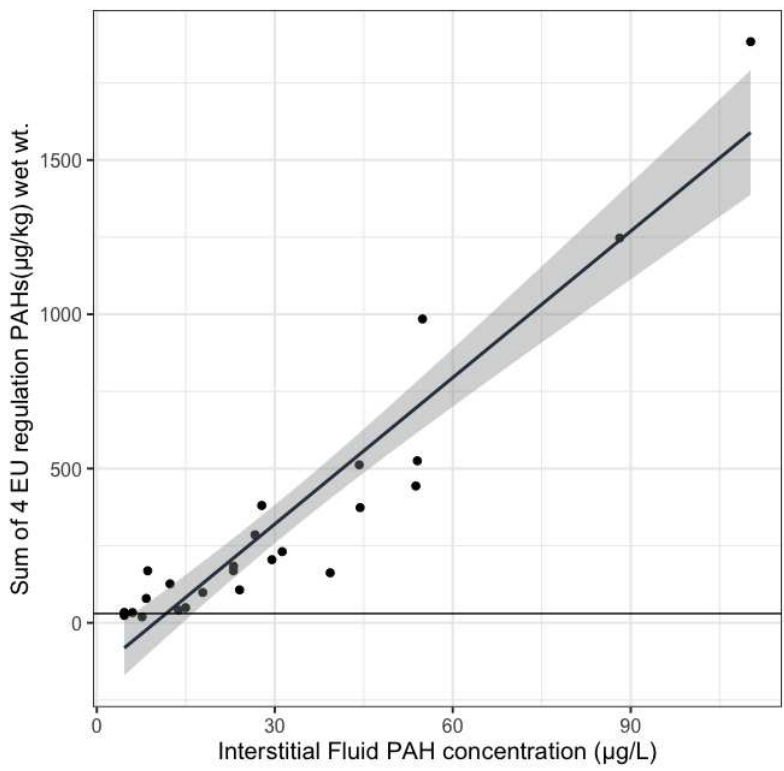

**Figure S1.** Regression model calibrated for PAH4 of EU regulation (Eqn:  $y=15.82x-154.79$ ;  $r^2 =0.89$ ,  $df=23$ ). Most oysters from the Elizabeth River sites had PAH levels that were orders of magnitude above maximum limits for human consumption ( $30\mu\text{g}/\text{kg}$  wet wt., denoted as black horizontal line).

1  
2  
3  
4  
5  
6  
7  
8  
9  
10  
11  
12  
13  
14  
15  
16  
17  
18  
19  
20  
21  
22  
23  
24  
25  
26  
27  
28  
29  
30  
31  
32  
33  
34  
35  
36  
37  
38  
39  
40  
41  
42  
43  
44  
45  
46  
47  
48  
49  
50  
51  
52  
53  
54  
55  
56  
57  
58  
59  
60  
61  
62  
63  
64  
65

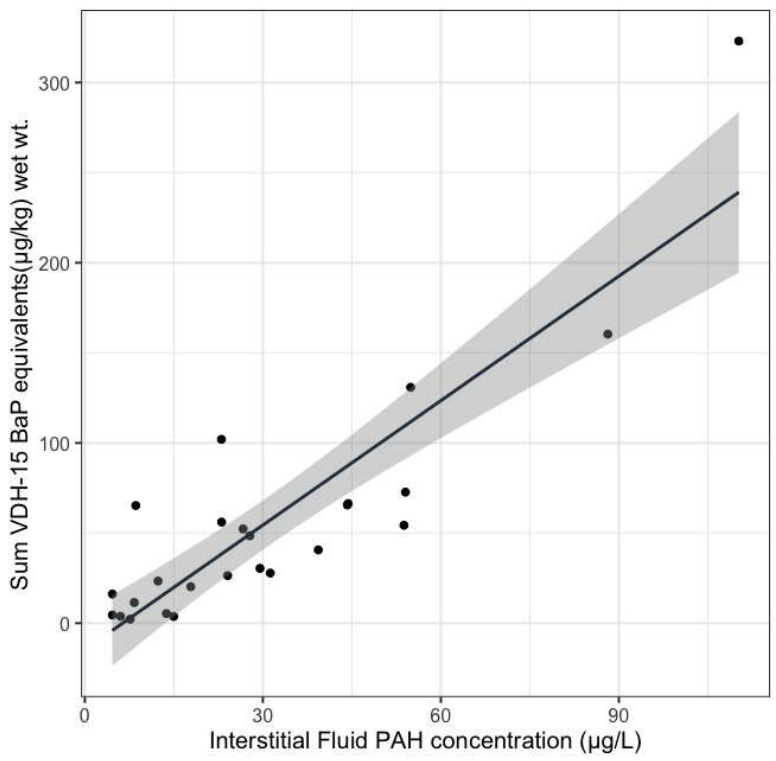

**Figure S2.** Regression model calibrated for 15 BaP equivalent concentrations of VDH health advisory (Eqn:  $y=2.3x-14.67$ ;  $r^2=0.77$ ,  $df=23$ ). Oysters from sites throughout the Elizabeth River fell within all 4 tiers of the VDH multi-tier advisory approach.

1  
2  
3  
4  
5  
6  
7  
8  
9  
10  
11  
12  
13  
14  
15  
16  
17  
18  
19  
20  
21  
22  
23  
24  
25  
26  
27  
28  
29  
30  
31  
32  
33  
34  
35  
36  
37  
38  
39  
40  
41  
42  
43  
44  
45  
46  
47  
48  
49  
50  
51  
52  
53  
54  
55  
56  
57  
58  
59  
60  
61  
62  
63  
64  
65

**Table S1.** List of PAH analytes, internal standard, and surrogate standards for GC-MS analysis

| <b>Name</b>                          | <b>CAS no.</b> | <b>Name</b>                     | <b>CAS no.</b> |
|--------------------------------------|----------------|---------------------------------|----------------|
| p-terphenyl (internal standard)      | 92-94-4        | phenanthridine                  | 229-87-8       |
| d8-naphthalene (surrogate std)       | 1146-65-2      | carbazole                       | 86-74-8        |
| naphthalene                          | 91-20-3        | 4-methyl dibenzothiophene       | 7372-88-5      |
| benzo(b)thiophene                    | 95-15-8        | 1-phenyl naphthalene            | 605-02-7       |
| isoquinoline                         | 119-65-3       | 2-methyl phenanthrene           | 2531-84-2      |
| quinoline                            | 91-22-5        | 2-methyl anthracene             | 613-12-7       |
| 2-methyl naphthalene                 | 91-57-6        | benzo(c)cinoline                | 230-17-1       |
| 1-methyl naphthalene                 | 90-12-0        | 4,5-methylene phenanthrene      | 203-64-5       |
| biphenyl                             | 92-52-4        | 1-methylanthracene              | 610-48-0       |
| 2-ethylnaphthalene                   | 939-27-5       | 4-methylphenanthrene            | 832-64-4       |
| 1-ethylnaphthalene                   | 1127-76-0      | 1-methylphenanthrene            | 832-69-9       |
| 2-methyl biphenyl (2-phenyl toluene) | 643-58-3       | 4,6-dimethyldibenzothiophene    | 1207-12-1      |
| diphenyl ether                       | 101-84-8       | 9-methyl anthracene             | 779-02-2       |
| 2,6&2,7 dimethyl naphthalene         | 581-42-0       | 2-phenyl naphthalene            | 612-94-2       |
| 1,3&1,7 -dimethyl naphthalene        | 575-41-7       | 3,6-dimethyl phenanthrene       | 1576-67-6      |
| 1,6-dimethyl naphthalene             | 575-43-9       | 2-ethyl anthracene              | 52251-71-5     |
| 1,4&2,3 dimethyl naphthalene         | 571-58-4       | fluoranthene                    | 206-44-0       |
| 1,5-dimethyl naphthalene             | 571-61-9       | pyrene                          | 129-00-0       |
| acenaphthylene                       | 208-96-8       | 9,10-dimethyl anthracene        | 781-43-1       |
| 1,2-dimethyl naphthalene             | 573-98-8       | 2,3-benzofluorene               | 243-17-4       |
| 1,8-dimethyl naphthalene             | 569-41-5       | 1-methylpyrene                  | 2381-21-7      |
| d10-acenaphthene (surrogate std)     | 15067-26-2     | 1,1' binaphthyl (surrogate std) | 604-53-5       |
| 3-methyl biphenyl                    | 643-93-6       | 9-phenyl anthracene             | 602-55-1       |
| acenaphthene                         | 83-32-9        | benz(a)anthracene               | 56-55-3        |
| dibenzofuran                         | 132-64-9       | d12-chrysene (surrogate std)    | 1719-03-5      |
| 2,3,6 trimethyl naphthalene          | 829-26-5       | chrysene                        | 218-01-9       |
| 2,3,5-trimethyl naphthalene          | 2245-38-7      | benzo(b)fluoranthene            | 205-99-2       |
| fluorene                             | 86-73-7        | benzo(k)fluoranthene            | 207-08-9       |
| 3,3'-dimethyl biphenyl               | 612-75-9       | benzo(j)fluoranthene            | 205-82-3       |
| 1,4,5-trimethyl naphthalene          | 2131-41-1      | benzo(e)pyrene                  | 192-97-2       |
| 1-methylfluorene                     | 1730-37-6      | benzo(a)pyrene                  | 50-32-8        |
| dibenzo(b)thiophene                  | 132-65-0       | d12-perylene (surrogate std)    | 1520-96-3      |
| d10-phenanthrene (surrogate std)     | 1517-22-2      | perylene                        | 198-55-0       |
| phenanthrene                         | 85-01-8        | indeno (1,2,3-cd) pyrene        | 193-39-5       |
| anthracene                           | 120-12-7       | dibenzo (a,h) anthracene        | 53-70-3        |
| acridine                             | 260-94-6       | benzo (g,h,i) perylene          | 191-24-2       |

1  
2  
3  
4  
5  
6  
7  
8  
9  
10  
11  
12  
13  
14  
15  
16  
17  
18  
19  
20  
21  
22  
23  
24  
25  
26  
27  
28  
29  
30  
31  
32  
33  
34  
35  
36  
37  
38  
39  
40  
41  
42  
43  
44  
45  
46  
47  
48  
49  
50  
51  
52  
53  
54  
55  
56  
57  
58  
59  
60  
61  
62  
63  
64  
65

**Table S2.** List of toxic equivalent factors (TEF) and converted benzo [a] pyrene equivalent concentrations (BaPEs) for VDH's 15 priority PAHs across Elizabeth River Sites. BaPEs were calculated by multiplying their respective TEF (first column) by original analyte concentration. Concentrations listed in the table have already been converted to a BaPE concentration. Total BaPE concentrations at each site were then converted to a wet weight concentration via wet to dry weight ratio for each sample.

| PAH compound            | TEF   | MP2   | JRW5  | PARCR | JCBH  | JCBR  | RS     | GR   | CLV  | HB   | HR   | PB   | GLM   | 264  | HS    | NSC   | CMP   | BK    | MPB   | PCR   | 164   | JB    | CB-001 | CB-002 | CB-004 | CB-005 |     |
|-------------------------|-------|-------|-------|-------|-------|-------|--------|------|------|------|------|------|-------|------|-------|-------|-------|-------|-------|-------|-------|-------|--------|--------|--------|--------|-----|
| acenaaphthylene         | 0.001 | 0.1   | 0.0   | 0.0   | 0.0   | 0.0   | 0.0    | 0.0  | 0.0  | 0.0  | 0.1  | 0.0  | 0.0   | 0.0  | 0.0   | 0.0   | 0.0   | 0.0   | 0.0   | 0.0   | 0.0   | 0.0   | 0.2    | 0.0    | 0.0    | 0.1    |     |
| acenaaphene             | 0.001 | 0.0   | 0.0   | 0.0   | 0.0   | 0.0   | 0.0    | 0.0  | 0.0  | 0.0  | 0.0  | 0.0  | 0.0   | 0.0  | 0.0   | 0.0   | 0.0   | 0.0   | 0.0   | 0.0   | 0.0   | 0.0   | 0.0    | 0.0    | 0.0    | 0.0    | 0.0 |
| fluorene                | 0.001 | 0.0   | 0.0   | 0.0   | 0.0   | 0.1   | 0.0    | 0.0  | 0.0  | 0.0  | 0.0  | 0.0  | 0.0   | 0.0  | 0.0   | 0.0   | 0.0   | 0.0   | 0.0   | 0.0   | 0.0   | 0.0   | 0.0    | 0.0    | 0.0    | 0.0    | 0.0 |
| phenanthrene            | 0.001 | 0.1   | 0.1   | 0.0   | 0.1   | 0.6   | 0.1    | 0.1  | 0.0  | 0.0  | 0.0  | 0.1  | 0.1   | 0.3  | 0.2   | 0.2   | 0.2   | 0.1   | 0.2   | 0.1   | 0.2   | 0.1   | 0.1    | 0.1    | 0.1    | 0.1    | 0.2 |
| anthracene              | 0.01  | 0.7   | 0.0   | 0.3   | 0.4   | 1.4   | 1.1    | 0.1  | 0.1  | 0.1  | 0.2  | 0.2  | 0.2   | 0.1  | 0.1   | 0.1   | 0.2   | 0.2   | 0.2   | 0.2   | 0.2   | 0.3   | 0.5    | 0.9    | 1.1    | 1.0    |     |
| fluoranthene            | 0.001 | 0.6   | 0.3   | 0.7   | 0.9   | 3.2   | 9.3    | 0.2  | 0.2  | 0.2  | 0.4  | 0.3  | 0.6   | 0.5  | 1.2   | 0.8   | 1.4   | 1.4   | 1.4   | 1.8   | 1.0   | 1.8   | 1.0    | 1.4    | 2.2    | 3.3    |     |
| pyrene                  | 0.001 | 0.5   | 0.3   | 0.5   | 0.5   | 2.2   | 6.3    | 0.2  | 0.1  | 0.1  | 0.3  | 0.2  | 0.4   | 0.3  | 1.0   | 0.6   | 0.9   | 0.8   | 0.9   | 1.2   | 0.6   | 1.1   | 0.5    | 0.7    | 1.1    | 1.8    |     |
| benz (a) anthracene     | 0.1   | 22.4  | 3.5   | 17.2  | 22.9  | 67.3  | 149.2  | 7.6  | 4.9  | 3.1  | 11.9 | 6.6  | 14.5  | 5.0  | 33.5  | 21.9  | 29.1  | 38.4  | 45.5  | 58.5  | 15.8  | 46.8  | 16.9   | 25.1   | 30.4   | 36.8   |     |
| chrysene                | 0.01  | 3.7   | 0.6   | 2.4   | 3.3   | 16.7  | 39.7   | 0.9  | 0.8  | 0.6  | 1.7  | 1.0  | 2.6   | 1.5  | 3.6   | 2.3   | 4.9   | 5.5   | 6.4   | 8.3   | 6.6   | 14.9  | 5.7    | 8.5    | 15.2   | 19.1   |     |
| benzo(b) fluoranthene   | 0.1   | 114.7 | 4.0   | 40.0  | 66.2  | 125.0 | 785.3  | 8.2  | 8.5  | 4.7  | 19.3 | 9.3  | 24.6  | 10.8 | 29.0  | 13.0  | 39.2  | 46.8  | 69.9  | 83.1  | 50.1  | 128.3 | 134.9  | 201.8  | 390.3  | 472.6  |     |
| benzo(k) fluoranthene   | 0.1   | 90.4  | 6.6   | 26.8  | 35.2  | 65.7  | 522.5  | 5.6  | 6.2  | 3.5  | 11.0 | 6.2  | 12.2  | 1.6  | 26.9  | 9.6   | 23.6  | 21.5  | 35.8  | 40.0  | 18.9  | 48.1  | 74.2   | 87.4   | 118.3  | 184.3  |     |
| benzo(a)pyrene          | 1     | 550.2 | 179.0 | 101.1 | 206.1 | 144.6 | 810.3  | 0.0  | 6.4  | 2.5  | 24.5 | 0.0  | 13.0  | 2.7  | 197.5 | 63.2  | 75.7  | 48.6  | 76.2  | 90.4  | 65.0  | 115.0 | 100.8  | 80.9   | 147.5  | 123.8  |     |
| indeno(1,2,3-cd)pyrene  | 0.1   | 47.4  | 21.3  | 0.0   | 13.6  | 11.7  | 49.3   | 2.1  | 0.0  | 0.0  | 1.7  | 4.7  | 2.2   | 0.0  | 21.4  | 8.0   | 12.3  | 4.3   | 5.7   | 6.9   | 4.1   | 4.4   | 17.3   | 15.7   | 22.9   | 28.5   |     |
| di-benzo(a,h)anthracene | 5     | 0.0   | 0.0   | 0.0   | 0.0   | 0.0   | 0.0    | 0.0  | 0.0  | 0.0  | 0.0  | 0.0  | 0.0   | 50.2 | 0.0   | 0.0   | 0.0   | 0.0   | 0.0   | 0.0   | 0.0   | 62.3  | 0.0    | 0.0    | 0.0    | 0.0    |     |
| benzo(g,h,i)perylene    | 0.1   | 51.2  | 0.0   | 0.0   | 10.2  | 21.6  | 55.5   | 2.9  | 2.0  | 1.5  | 2.9  | 4.7  | 3.0   | 0.6  | 22.4  | 8.5   | 11.0  | 5.9   | 7.0   | 6.6   | 4.1   | 5.5   | 36.9   | 21.1   | 51.0   | 44.8   |     |
| SUM VDH-15 (dry wt.)    |       | 882.0 | 215.8 | 189.0 | 359.7 | 460.4 | 2428.7 | 27.9 | 29.2 | 16.3 | 73.9 | 33.3 | 123.6 | 23.2 | 713.2 | 159.0 | 381.5 | 215.6 | 344.2 | 297.3 | 166.5 | 428.6 | 389.1  | 443.7  | 780.2  | 916.2  |     |
| wet to dry wt. ratio    |       | 0.24  | 0.57  | 0.11  | 0.14  | 0.04  | 0.06   | 0.00 | 0.03 | 0.02 | 0.05 | 0.00 | 0.02  | 0.01 | 0.17  | 0.10  | 0.06  | 0.03  | 0.04  | 0.04  | 0.05  | 0.03  | 0.05   | 0.03   | 0.03   | 0.02   |     |
| SUM VDH-15 (wet wt.)    |       | 65.3  | 16.2  | 20.2  | 40.6  | 54.3  | 233.0  | 3.8  | 4.5  | 2.2  | 11.5 | 5.3  | 23.4  | 3.7  | 102.0 | 26.4  | 36.1  | 30.4  | 52.3  | 48.5  | 27.8  | 65.6  | 17.9   | 11.2   | 19.6   | 15.9   |     |

**Table S3.** List of EFSA-4 PAH concentrations across Elizabeth River Sites. Total dry weight concentrations converted to wet weight through multiplying by wet to dry weight ratio for each sample.

| PAH compound         | MP2    | JRW5  | PARCR  | JCBH   | JCBR   | RS      | GR    | CLV   | HB    | HR    | PB    | GLM   | 264   | HS     | NSC   | CMP    | BK     | MPB    | PCR    | 164    | JB     | CB-001 | CB-002 | CB-004 | CB-005 |
|----------------------|--------|-------|--------|--------|--------|---------|-------|-------|-------|-------|-------|-------|-------|--------|-------|--------|--------|--------|--------|--------|--------|--------|--------|--------|--------|
| benz(a)anthracene    | 224.1  | 34.7  | 171.8  | 229.2  | 673.5  | 1491.6  | 75.8  | 48.8  | 30.6  | 119.2 | 66.5  | 145.4 | 50.5  | 335.2  | 218.8 | 290.7  | 384.3  | 454.6  | 585.4  | 157.8  | 467.9  | 168.9  | 251.1  | 303.9  | 388.4  |
| chrysene             | 369.6  | 61.8  | 241.9  | 333.2  | 1673.8 | 3967.8  | 85.8  | 78.6  | 60.5  | 173.6 | 100.5 | 264.6 | 147.1 | 356.7  | 231.7 | 493.3  | 551.7  | 642.9  | 826.8  | 655.9  | 1486.7 | 570.6  | 853.9  | 1515.4 | 1907.1 |
| benzo(b)fluoranthene | 1147.4 | 40.5  | 400.2  | 661.6  | 1250.4 | 7853.5  | 82.4  | 84.9  | 46.9  | 192.8 | 93.0  | 245.7 | 107.6 | 289.8  | 129.9 | 392.4  | 467.9  | 698.8  | 830.6  | 501.2  | 1283.5 | 1349.0 | 2018.4 | 3903.1 | 4725.6 |
| benzo(a)pyrene       | 550.2  | 179.0 | 101.1  | 206.1  | 144.6  | 810.3   | 0.0   | 6.4   | 2.5   | 24.5  | 0.0   | 13.0  | 2.7   | 197.5  | 63.2  | 75.7   | 48.6   | 76.2   | 90.4   | 65.0   | 115.0  | 100.8  | 80.9   | 147.5  | 123.8  |
| SUM EFSA-4 (dry wt.) | 2291.3 | 316.1 | 1915.0 | 1430.1 | 3742.4 | 14123.1 | 244.0 | 218.7 | 140.5 | 510.1 | 260.0 | 668.7 | 307.8 | 1179.3 | 643.5 | 1252.1 | 1452.5 | 1872.5 | 2333.2 | 1379.9 | 3353.1 | 2189.4 | 3204.3 | 5869.9 | 7124.9 |
| wet to dry wt. ratio | 0.24   | 0.57  | 0.11   | 0.14   | 0.04   | 0.06    | 0.00  | 0.03  | 0.02  | 0.05  | 0.00  | 0.02  | 0.01  | 0.17   | 0.10  | 0.06   | 0.03   | 0.04   | 0.04   | 0.05   | 0.03   | 0.05   | 0.03   | 0.03   | 0.02   |
| SUM EFSA-4 (wet wt.) | 168.7  | 23.6  | 98.3   | 162.1  | 443.5  | 1883.6  | 33.2  | 33.7  | 19.1  | 79.0  | 41.6  | 126.2 | 49.2  | 168.5  | 106.7 | 183.5  | 204.6  | 285.1  | 380.4  | 230.7  | 512.1  | 373.5  | 525.2  | 984.8  | 1247.2 |

**Table S4.** List of EPA-16 PAH concentrations across Elizabeth River Sites. Total dry weight concentrations converted to wet weight through multiplying by wet to dry weight ratio for each sample.

| PAH compound            | MP2    | JRW5  | PARCR | JCBH  | JCBR   | RS     | GR    | CLV   | HB    | HR    | PB    | GLM   | 264   | HS     | NSC   | CMP    | BK     | MPB    | PCR    | 164   | JB     | CB-001 | CB-002 | CB-004 | CB-005 |
|-------------------------|--------|-------|-------|-------|--------|--------|-------|-------|-------|-------|-------|-------|-------|--------|-------|--------|--------|--------|--------|-------|--------|--------|--------|--------|--------|
| naphthalene             | 0.0    | 28.3  | 22.1  | 12.2  | 18.7   | 74.6   | 21.5  | 0.0   | 9.5   | 26.5  | 51.1  | 14.6  | 16.3  | 28.7   | 27.6  | 37.6   | 24.9   | 21.3   | 13.8   | 23.8  | 15.6   | 111.8  | 42.7   | 113.9  | 36.5   |
| acenaaphthylene         | 55.2   | 0.0   | 0.0   | 36.7  | 25.0   | 46.6   | 0.0   | 0.0   | 0.0   | 52.9  | 0.0   | 14.6  | 0.0   | 21.6   | 0.0   | 0.0    | 8.3    | 21.3   | 20.8   | 7.9   | 23.4   | 167.7  | 34.2   | 46.9   | 116.8  |
| acenaaphthene           | 32.0   | 0.0   | 20.9  | 23.5  | 49.6   | 22.8   | 38.1  | 22.4  | 11.2  | 18.9  | 42.2  | 15.1  | 17.3  | 17.0   | 19.0  | 23.5   | 23.4   | 25.7   | 21.2   | 18.0  | 26.0   | 8.8    | 23.4   | 29.3   | 0.0    |
| fluorene                | 0.0    | 0.0   | 0.0   | 44.7  | 101.7  | 31.4   | 32.7  | 22.4  | 22.4  | 15.9  | 35.2  | 15.1  | 17.3  | 22.7   | 19.0  | 11.8   | 23.4   | 15.4   | 21.2   | 18.0  | 15.6   | 0.0    | 20.8   | 0.0    | 0.0    |
| phenanthrene            | 104.9  | 103.7 | 44.6  | 82.9  | 610.2  | 148.8  | 60.0  | 30.8  | 30.3  | 23.8  | 43.4  | 88.8  | 117.2 | 344.4  | 158.9 | 203.0  | 173.0  | 122.4  | 154.8  | 148.1 | 153.5  | 111.4  | 133.6  | 145.3  | 158.2  |
| anthracene              | 69.9   | 0.0   | 27.2  | 39.3  | 141.8  | 113.0  | 10.7  | 8.8   | 9.3   | 15.9  | 15.3  | 21.1  | 14.3  | 12.7   | 10.2  | 19.8   | 20.1   | 24.0   | 24.7   | 17.4  | 26.7   | 53.4   | 86.4   | 106.7  | 97.7   |
| fluoranthene            | 624.4  | 282.2 | 684.1 | 928.8 | 2121.5 | 9289.9 | 233.5 | 206.7 | 184.0 | 394.2 | 319.3 | 553.8 | 459.1 | 1231.8 | 784.1 | 1411.1 | 1376.7 | 1370.5 | 1843.5 | 972.7 | 1762.3 | 1016.5 | 1414.2 | 2187.0 | 3262.3 |
| pyrene                  | 524.6  | 250.2 | 529.6 | 538.2 | 2191.7 | 6317.0 | 162.8 | 149.5 | 118.8 | 259.3 | 214.6 | 355.1 | 286.9 | 1012.1 | 556.0 | 911.0  | 840.0  | 912.1  | 1238.0 | 583.6 | 1110.4 | 545.4  | 693.4  | 1105.5 | 1840.2 |
| benzo(a)anthracene      | 224.1  | 34.7  | 171.8 | 229.2 | 673.5  | 1491.6 | 75.8  | 48.8  | 30.6  | 119.2 | 66.5  | 145.4 | 50.5  | 335.2  | 218.8 | 290.7  | 384.3  | 454.6  | 585.4  | 157.8 | 467.9  | 168.9  | 251.1  | 303.9  | 388.4  |
| benzo(b)fluoranthene    | 369.6  | 61.8  | 241.9 | 333.2 | 1673.8 | 3967.8 | 85.8  | 78.6  | 60.5  | 173.6 | 100.5 | 264.6 | 147.1 | 356.7  | 231.7 | 493.3  | 551.7  | 642.9  | 826.8  | 655.9 | 1486.7 | 570.6  | 853.9  | 1515.4 | 1907.1 |
| benzo(k) fluoranthene   | 1147.4 | 40.5  | 400.2 | 661.6 | 1250.4 | 7853.5 | 82.4  | 84.9  | 46.9  | 192.8 | 93.0  | 245.7 | 107.6 | 289.8  | 129.9 | 392.4  | 467.9  | 698.8  | 830.6  | 501.2 | 1283.5 | 1349.0 | 2018.4 | 3903.1 | 4725.6 |
| benzo(a)pyrene          | 903.8  | 66.1  | 267.6 | 352.4 | 656.7  | 5225.0 | 56.4  | 61.6  | 34.6  | 109.7 | 61.6  | 121.7 | 16.3  | 268.6  | 95.9  | 236.3  | 215.1  | 358.3  | 400.0  | 188.7 | 481.3  | 742.0  | 873.7  | 1183.4 | 1842.7 |
| benzo(a)pyrene          | 550.2  | 179.0 | 101.1 | 206.1 | 144.6  | 810.3  | 0.0   | 6.4   | 2.5   | 24.5  | 0.0   | 13.0  | 2.7   | 197.5  | 63.2  | 75.7   | 48.6   | 76.2   | 90.4   | 65.0  | 115.0  | 100.8  | 80.9   | 147.5  | 123.8  |
| indeno(1,2,3-cd)pyrene  | 473.7  | 213.4 | 0.0   | 136.2 | 117.0  | 492.6  | 21.0  | 0.0   | 0.0   | 16.6  | 47.0  | 22.1  | 0.0   | 214.2  | 80.4  | 122.8  | 43.3   | 57.0   | 68.7   | 41.3  | 43.6   | 172.7  | 156.5  | 228.8  | 284.7  |
| di-benzo(a,h)anthracene | 0.0    | 0.0   | 0.0   | 0.0   | 0.0    | 0.0    | 0.0   | 0.0   | 0.0   | 0.0   | 0.0   | 0.0   | 0.0   | 10.0   | 0.0   | 75.2   | 6.2    | 36.6   | 8.4    | 19.0  | 0.0    |        |        |        |        |
